# Supplementary material for: A Modeling Framework to Frame a Biological Invasion: Impatiens glandulifera in North America
Source: MDPI journal article supplement (doi:10.3390/plants12071433), 2023-03-24

**Table S1.** Permutation importance percentages of the bioclimatic variables used in the simulations as predictors for MaxEnt model training

|       | <b>Bioclimatic Variable</b>         | <b>Permutation Importance (%)</b> |
|-------|-------------------------------------|-----------------------------------|
| BIO13 | Precipitation of Wettest Month      | 22.55                             |
| BIO11 | Mean Temperature of Coldest Quarter | 20.15                             |
| BIO15 | Precipitation Seasonality           | 15.04                             |
| BIO1  | Annual Mean Temperature             | 12.96                             |
| BIO9  | Mean Temperature of Driest Quarter  | 7.26                              |
| BIO6  | Min Temperature of Coldest Month    | 4.05                              |
| BIO18 | Precipitation of Warmest Quarter    | 3.22                              |
| BIO4  | Temperature Seasonality             | 2.34                              |
|       |                                     | <b>Sum: 87.57</b>                 |

**Table S2.** Assigned values of the defined variables in Agent Based Component

| <b>Procedure</b>      | <b>Sub-procedure</b>      | <b>Variable</b>               | <b>Value</b> | <b>Unit</b> |
|-----------------------|---------------------------|-------------------------------|--------------|-------------|
| Climatic Window       | Chilling period           | Accumulated Chilling Hours    | 720          | hour        |
| Climatic Window       | Seed Banking              | Seed Banking Duration         | 1            | year        |
| Climatic Window       | Productive Agent Sampling | Occurence Sample              | 1            | per cell    |
| Propagule             | Propagule Production      | Propagule Count               | 50           | per agent   |
| Propagule             | Propagule Dispersal       | Mean Dispersal Distance       | 5            | km          |
| Propagule             | Propagule Dispersal       | Maximum Dispersal Distance    | 38           | km          |
| Landscape Suitability | Topographic Suitability   | Maximum Elevation             | 1000         | m           |
| Landscape Suitability | Topographic Suitability   | Maximum Slope                 | 20           | degrees     |
| Landscape Suitability | Soil pH Suitability       | Minimum suitable soil Ph      | 4.5          |             |
| Landscape Suitability | Soil pH Suitability       | Maximum suitable soil Ph      | 7.7          |             |
| Landscape Suitability | Land Use Suitability      | Maximum Agricultural Coverage | 80           | %           |

**Table S3.** The parameter sets of One-factor-at-a-time (OFAT) sensitivity analysis

|                                                              | Abbreviation         | Mean<br>Dispersal<br>Distance<br>(km) | Maximum<br>Dispersal<br>Distance<br>(km) | Propagule<br>Production<br>(propagule) | Accumulated<br>Chilling<br>Hours<br>(h) | Maximum<br>Agricultural<br>Coverage<br>(%) | Maximum<br>Elevation<br>(m) | Conducted<br>Simulations |
|--------------------------------------------------------------|----------------------|---------------------------------------|------------------------------------------|----------------------------------------|-----------------------------------------|--------------------------------------------|-----------------------------|--------------------------|
| <b>Nominal Set</b>                                           | NS                   | 5                                     | 38                                       | 50                                     | 720                                     | 80                                         | 1000                        | 50                       |
| <b>Mean<br/>Dispersal<br/>Distance<br/>Simulations</b>       | MnDD <sub>2.5</sub>  | <b>2.5</b>                            | 38                                       | 50                                     | 720                                     | 80                                         | 1000                        | 10                       |
|                                                              | MnDD <sub>3.75</sub> | <b>3.75</b>                           | 38                                       | 50                                     | 720                                     | 80                                         | 1000                        | 10                       |
|                                                              | MnDD <sub>6.25</sub> | <b>6.25</b>                           | 38                                       | 50                                     | 720                                     | 80                                         | 1000                        | 10                       |
|                                                              | MnDD <sub>7.5</sub>  | <b>7.5</b>                            | 38                                       | 50                                     | 720                                     | 80                                         | 1000                        | 10                       |
| <b>Maximum<br/>Dispersal<br/>Distance<br/>Simulations</b>    | MxDD <sub>18</sub>   | 5                                     | <b>18</b>                                | 50                                     | 720                                     | 80                                         | 1000                        | 10                       |
|                                                              | MxDD <sub>28</sub>   | 5                                     | <b>28</b>                                | 50                                     | 720                                     | 80                                         | 1000                        | 10                       |
|                                                              | MxDD <sub>48</sub>   | 5                                     | <b>48</b>                                | 50                                     | 720                                     | 80                                         | 1000                        | 10                       |
|                                                              | MxDD <sub>58</sub>   | 5                                     | <b>58</b>                                | 50                                     | 720                                     | 80                                         | 1000                        | 10                       |
| <b>Propagule<br/>Production<br/>Simulations</b>              | PP <sub>30</sub>     | 5                                     | 38                                       | <b>30</b>                              | 720                                     | 80                                         | 1000                        | 10                       |
|                                                              | PP <sub>40</sub>     | 5                                     | 38                                       | <b>40</b>                              | 720                                     | 80                                         | 1000                        | 10                       |
|                                                              | PP <sub>60</sub>     | 5                                     | 38                                       | <b>60</b>                              | 720                                     | 80                                         | 1000                        | 10                       |
|                                                              | PP <sub>70</sub>     | 5                                     | 38                                       | <b>70</b>                              | 720                                     | 80                                         | 1000                        | 10                       |
| <b>Accumulated<br/>Chilling<br/>Hours<br/>Simulations</b>    | ACH <sub>600</sub>   | 5                                     | 38                                       | 50                                     | <b>600</b>                              | 80                                         | 1000                        | 10                       |
|                                                              | ACH <sub>840</sub>   | 5                                     | 38                                       | 50                                     | <b>840</b>                              | 80                                         | 1000                        | 10                       |
|                                                              | ACH <sub>960</sub>   | 5                                     | 38                                       | 50                                     | <b>960</b>                              | 80                                         | 1000                        | 10                       |
|                                                              | ACH <sub>1080</sub>  | 5                                     | 38                                       | 50                                     | <b>1080</b>                             | 80                                         | 1000                        | 10                       |
| <b>Maximum<br/>Agricultural<br/>Coverage<br/>Simulations</b> | MEC <sub>50</sub>    | 5                                     | 38                                       | 50                                     | 720                                     | <b>50</b>                                  | 1000                        | 10                       |
|                                                              | MEC <sub>60</sub>    | 5                                     | 38                                       | 50                                     | 720                                     | <b>60</b>                                  | 1000                        | 10                       |
|                                                              | MEC <sub>70</sub>    | 5                                     | 38                                       | 50                                     | 720                                     | <b>70</b>                                  | 1000                        | 10                       |
|                                                              | MEC <sub>90</sub>    | 5                                     | 38                                       | 50                                     | 720                                     | <b>90</b>                                  | 1000                        | 10                       |
| <b>Maximum<br/>Elevation<br/>Simulations</b>                 | ME <sub>700</sub>    | 5                                     | 38                                       | 50                                     | 720                                     | 80                                         | <b>700</b>                  | 10                       |
|                                                              | ME <sub>800</sub>    | 5                                     | 38                                       | 50                                     | 720                                     | 80                                         | <b>800</b>                  | 10                       |
|                                                              | ME <sub>900</sub>    | 5                                     | 38                                       | 50                                     | 720                                     | 80                                         | <b>900</b>                  | 10                       |
|                                                              | ME <sub>1100</sub>   | 5                                     | 38                                       | 50                                     | 720                                     | 80                                         | <b>1100</b>                 | 10                       |

**Figure S1.** Results of the OFAT analysis for the evaluated variables. (a) Maximum Dispersal Distance (b) Mean Dispersal Distance (c) Propagule Production (d) Accumulated Chilling Hours (e) Maximum Agricultural Coverage (f) Maximum Elevation

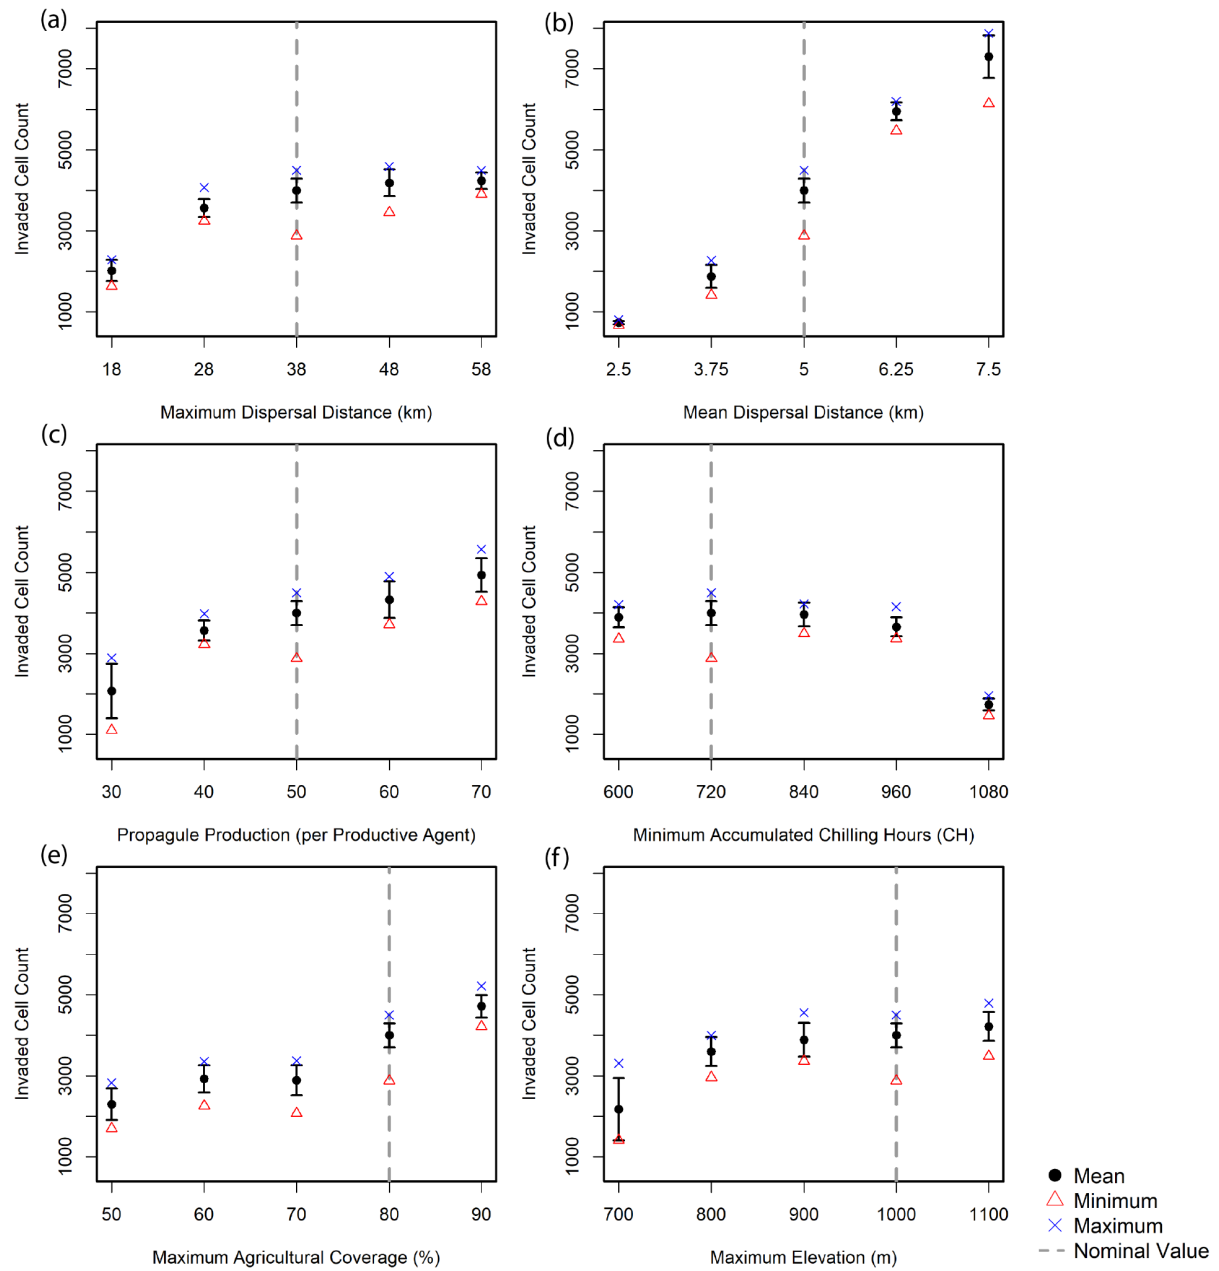

**Figure S2.** Inter-simulation agreement maps of the projected invasive ranges Maximum Dispersal Distance (a to e) and Mean Dispersal Distance (f to j) simulations. The abbreviations are given in the Supplementary Table-3. (a)MxDD<sub>2.5</sub>, (b)MxDD<sub>3.75</sub>, (c)NS, (d)MxDD<sub>6.25</sub>, (e)MxDD<sub>7.5</sub> (f)MnDD<sub>18</sub>, (g)MnDD<sub>28</sub>, (h)NS, (i)MnDD<sub>48</sub>, (j)MnDD<sub>58</sub>

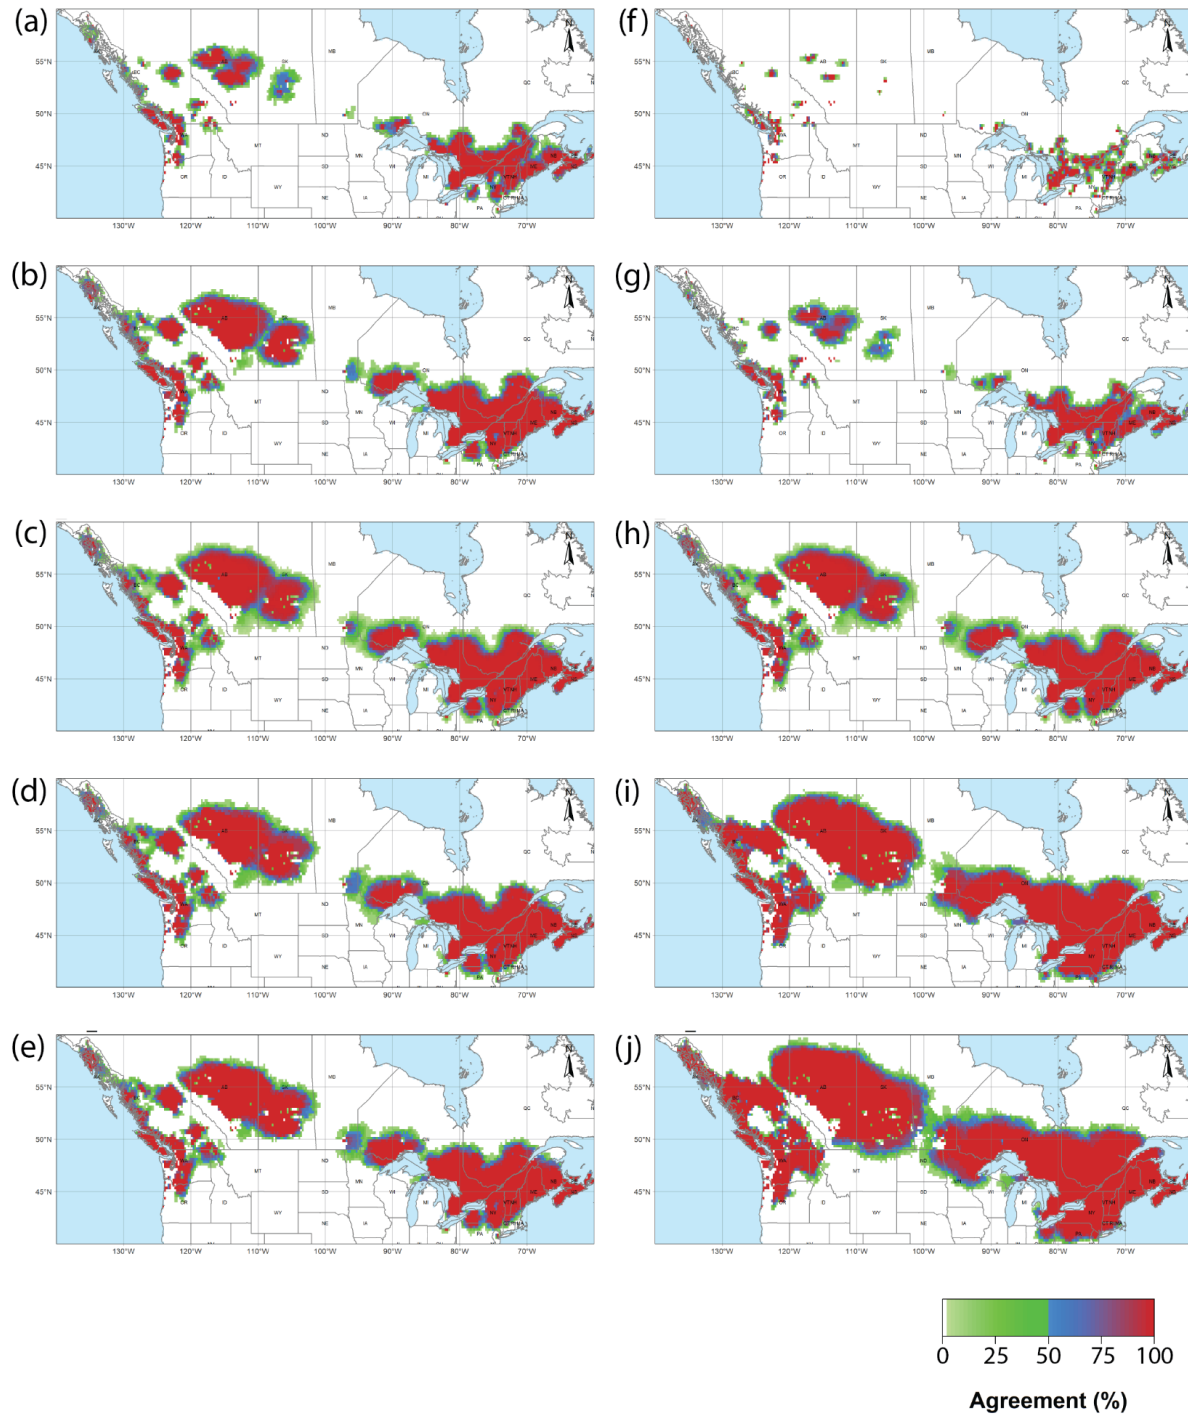

**Figure S3.** Inter-simulation agreement maps of the projected invasive ranges Propagule Production (a to e) and Accumulated Chilling Hours (f to j) simulations. The abbreviations are given in the Supplementary Table-3. (a)PP<sub>30</sub>, (b)PP<sub>40</sub>, (c)NS, (d)PP<sub>60</sub>, (e)PP<sub>70</sub>, (f)ACH<sub>600</sub>, (g)NS, (h)ACH<sub>840</sub>, (i)ACH<sub>960</sub>, (j)ACH<sub>1080</sub>

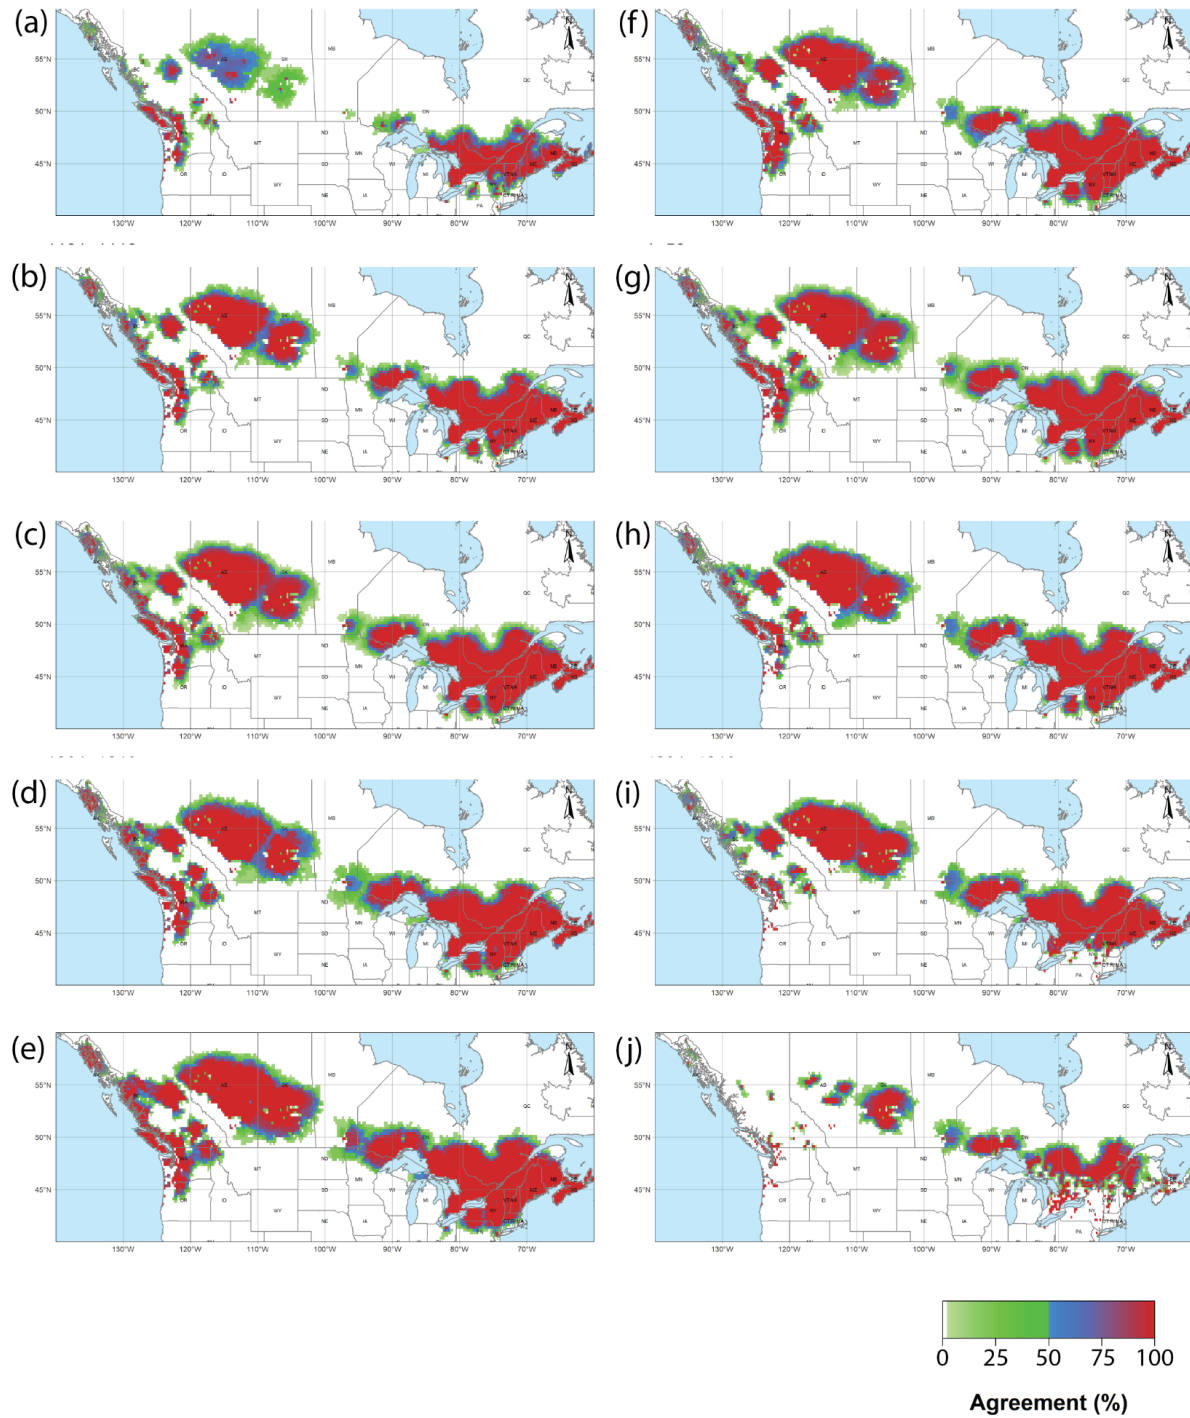

**Figure S4.** Inter-simulation agreement maps of the projected invasive ranges Maximum Agricultural Coverage (a to e) and Maximum Elevation (f to j) simulations. The abbreviations are given in the Supplementary Table-3. (a)MEC<sub>50</sub>, (b)MEC<sub>60</sub>, (c)MEC<sub>70</sub>, (d)NS, (e)MEC<sub>90</sub>, (f)ME<sub>700</sub>, (g)ME<sub>800</sub>, (h)ME<sub>900</sub>, (i)NS, (j)ME<sub>1100</sub>

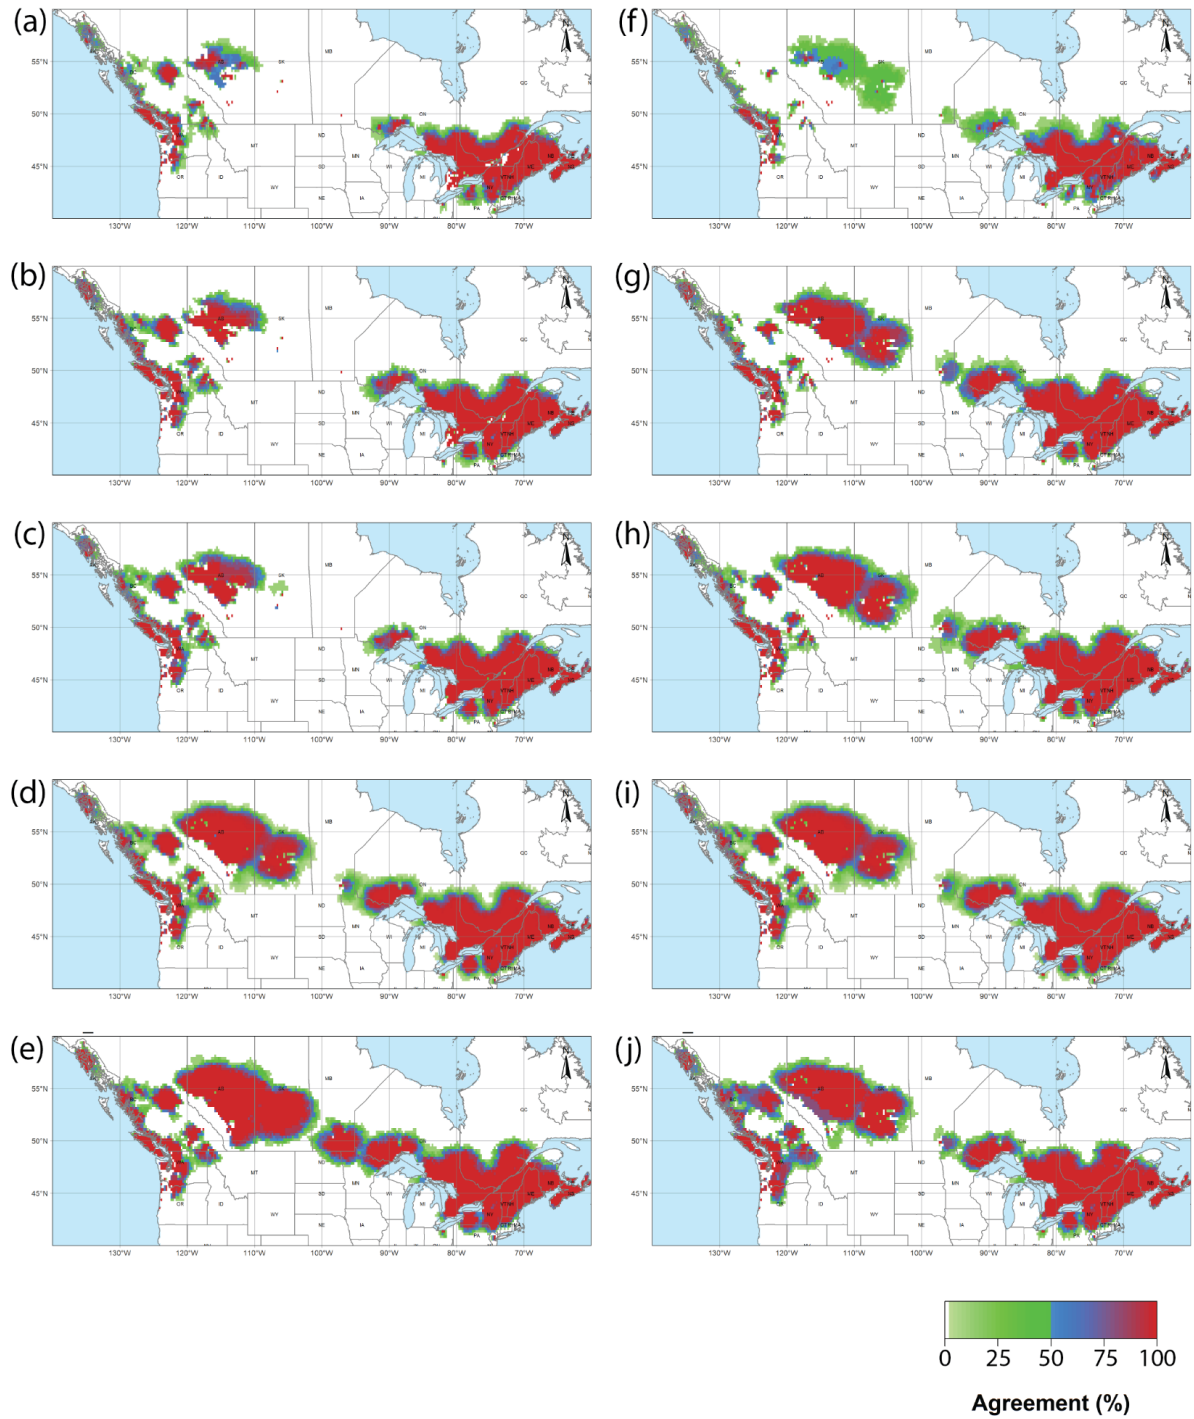

Supplement: s1 [file s1]
